# Supplementary material for: Perceptions of postnatal care: factors associated with primiparous mothers perceptions of postnatal communication and care
Source: PubMed Central journal article supplement (PMC4029156; doi:10.1186/1471-2393-13-227), 2013-12-09
Supplement: 1471-2393-13-227-S1.pdf [file 1471-2393-13-227-S1.pdf]

GET

FILE='C:\Users\ah11\Documents\Teaching\HP Masters\projects\2010-2011\Julie McLellan 2010-2011\data and analysis\DATA SHEET 19th july final copy.sav'

.

DATASET NAME DataSet1 WINDOW=FRONT.

RELIABILITY

/VARIABLES=q0045\_0001 q0045\_0002 q0045\_0003 q0045\_0004 q0045\_0005 q0045\_0006 q0045\_0007 q0045\_0008 q0045\_0009 q0045\_0010 q0045\_0011 q0045\_0012

/SCALE('ALL VARIABLES') ALL

/MODEL=ALPHA.

## Reliability

[DataSet1] C:\Users\ah11\Documents\Teaching\HP Masters\projects\2010-2011\Julie McLellan 2010-2011\data and analysis\DATA SHEET 19th july final copy.sav

### Scale: ALL VARIABLES

#### Case Processing Summary

|       |                       | N   | %     |
|-------|-----------------------|-----|-------|
| Cases | Valid                 | 71  | 40.3  |
|       | Excluded <sup>a</sup> | 105 | 59.7  |
|       | Total                 | 176 | 100.0 |

a. Listwise deletion based on all variables in the procedure.

#### Reliability Statistics

| Cronbach's Alpha | N of Items |
|------------------|------------|
| .935             | 12         |
